# Supplementary material for: Integrated Transcriptome and Targeted Metabolite Analysis Reveal miRNA-mRNA Networks in Low-Light-Induced Lotus Flower Bud Abortion
Source: MDPI journal article supplement (doi:10.3390/ijms23179925), 2022-09-01
Supplement: s1 [file s1]

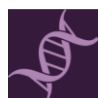

Article

# Integrated transcriptome and targeted metabolite analysis reveal miRNA-mRNA networks in low light-induced lotus flower bud abortion

Huihui Ren <sup>†</sup>, Yingchun Xu <sup>†</sup>, Hongsheng Lixie, Jiaying Kuang, Yanjie Wang and Qijiang Jin\*

College of Horticulture, Nanjing Agricultural University, Nanjing 210095, China

\* Correspondence: jqj@njau.edu.cn (J.Q.J.)

<sup>†</sup> These authors contributed equally to this study

## Supplementary material:

Table S1 Summary of high-throughput sequencing datasets.

| Sequencing Type | Sample name | Raw tag count (Mb) | Clean tag count (Mb) | Q20 of clean tag (%) | Percentage of clean tag (%) | Mapped tag (Mb) | Mapped percentage (%) |
|-----------------|-------------|--------------------|----------------------|----------------------|-----------------------------|-----------------|-----------------------|
| sRNA            | Ab1         | 2.82               | 2.51                 | 99                   | 89.12                       | 2.3             | 92.77                 |
|                 | Ab2         | 3.00               | 2.76                 | 99                   | 92                          | 2.52            | 91.22                 |
|                 | Ab3         | 2.99               | 2.67                 | 99.2                 | 89.26                       | 2.41            | 90.23                 |
|                 | Ck1         | 2.84               | 2.55                 | 99.1                 | 89.69                       | 2.30            | 90.13                 |
|                 | Ck2         | 2.90               | 2.62                 | 99                   | 90.28                       | 2.39            | 91.20                 |
|                 | Ck3         | 2.94               | 2.65                 | 99.1                 | 90.06                       | 2.41            | 91.08                 |
| mRNA            | Ab1         | 67.47              | 62.4                 | 97.78                | 92.49                       | 57.30           | 91.83                 |
|                 | Ab2         | 69.96              | 65.19                | 97.7                 | 93.17                       | 60.69           | 93.09                 |
|                 | Ab3         | 69.96              | 64.36                | 97.62                | 91.99                       | 59.45           | 92.37                 |
|                 | Ck1         | 69.96              | 64.22                | 97.66                | 91.79                       | 60.21           | 93.75                 |
|                 | Ck2         | 69.96              | 64.15                | 97.68                | 91.68                       | 59.60           | 92.90                 |
|                 | Ck3         | 69.96              | 63.55                | 97.7                 | 90.83                       | 59.33           | 93.36                 |

| Type       | Abs total count | Percentage | Cks total count | Percentage |
|------------|-----------------|------------|-----------------|------------|
| total      | 79428450        | 100.00%    | 78138773        | 100.00%    |
| intergenic | 55380749        | 69.72%     | 52989557        | 67.81%     |
| mature     | 2360895         | 2.97%      | 2673100         | 3.42%      |
| Rfam other |                 |            |                 |            |
| sncRNA     | 27884           | 0.04%      | 14218           | 0.02%      |
| snRNA      | 21419           | 0.03%      | 3928            | 0.01%      |
| unmap      | 6777616         | 8.53%      | 7128962         | 9.12%      |
| intron     | 13009400        | 16.38%     | 13233788        | 16.94%     |
| rRNA       | 395614          | 0.50%      | 421192          | 0.54%      |
| hairpin    | 206584          | 0.26%      | 244385          | 0.31%      |
| snoRNA     | 3484            | 0.00%      | 3743            | 0.00%      |
| precursor  | 36551           | 0.05%      | 33326           | 0.04%      |
| exon       | 1204308         | 1.52%      | 1388719         | 1.78%      |
| tRNA       | 3946            | 0.00%      | 3855            | 0.00%      |

[illegible]

|                      |                            |   |   |   |   |   |   |   |   |
|----------------------|----------------------------|---|---|---|---|---|---|---|---|
|                      | NODCON2GM                  | o | o | o | o | o | o | o | 9 |
|                      | OSE1ROOTNODULE             | o | o | o | o | o | o | o | 9 |
|                      | OSE2ROOTNODULE             | o | o | o | o | o | o | o | 9 |
|                      | CPBCSPOR                   | o | o | o | o | o | o | o | 9 |
|                      | SEF4MOTIFGM7S              | o | o | o | o | o | o | o | 8 |
|                      | MYBST1                     |   | o | o | o | o | o | o | 8 |
|                      | PYRIMIDINEBOX-<br>OSRAMY1A | o | o |   | o | o | o | o | 8 |
|                      | BOXIINTPATPB               | o | o | o | o |   | o | o | 8 |
|                      | REALPHALGLHCB21            | o | o | o | o |   | o | o | 8 |
|                      | INRNTPSADB                 | o | o |   | o | o | o | o | 8 |
|                      | MYB2CONSENSUSAT            | o | o | o | o |   | o | o | 8 |
|                      | ACGTATERD1                 | o | o | o |   | o | o | o | 8 |
|                      | GAREAT                     | o | o | o | o | o |   | o | 8 |
|                      | CURECORECR                 | o | o |   | o | o | o | o | 8 |
|                      | SURECOREATSULTR11          | o | o | o | o |   | o | o | 8 |
|                      | ASF1MOTIFCAMV              | o | o | o |   | o | o |   | 7 |
|                      | MARTBOX                    | o | o |   | o | o | o |   | 7 |
|                      | POLASIG2                   | o | o | o | o |   | o |   | 7 |
|                      | TATABOX4                   | o | o | o | o |   | o |   | 7 |
|                      | -300ELEMENT                |   | o | o | o | o |   | o | 7 |
|                      | ELRECOREPCRP1              |   | o | o | o | o |   | o | 7 |
|                      | LTRECOREATCOR15            |   | o |   | o | o | o | o | 7 |
|                      | CIACADIANLELHC             | o | o |   |   | o | o | o | 7 |
|                      | RYREPEATBnAPA              |   | o | o | o | o | o | o | 7 |
|                      | ANAERO1CONSENSUS           | o | o |   | o | o | o | o | 7 |
|                      | ANAERO2CONSENSUS           | o | o | o | o |   | o |   | 7 |
|                      | EECCRAH1                   | o |   | o | o | o |   | o | 7 |
|                      | BIHD1OS                    | o | o | o | o |   | o |   | 7 |
|                      | MYBCOREATCYCB1             | o | o |   | o | o | o | o | 7 |
|                      | RHERPATExPA7               | o |   | o | o | o | o | o | 7 |
|                      | SEF3MOTIFGM                | o |   |   |   | o | o | o | 6 |
|                      | GT1CORE                    | o | o |   | o |   | o |   | 6 |
|                      | CANBNnAPA                  |   |   | o | o | o | o | o | 6 |
|                      | S1FBOXSORPS1L21            | o | o | o | o |   |   | o | 6 |
|                      | NTBBF1ARROLB               | o |   | o |   | o | o |   | 6 |
|                      | DPBFCOREDCDC3              | o | o |   |   | o | o |   | 6 |
| Stress re-<br>sponse | TATAPVTRNALEU              | o | o | o | o |   |   | o | 6 |
|                      | TBOXATGAPB                 |   | o |   | o | o |   | o | 6 |
|                      | TATCCAOSAMY                |   | o | o |   | o | o | o | 6 |
|                      | GAGAGMGSA1                 | o | o |   | o | o | o |   | 6 |
|                      | DRECRTCOREAT               |   | o |   | o | o | o |   | 6 |
|                      | GAGA8HVBKN3                | o | o |   | o | o | o |   | 6 |
|                      | CARGCW8GAT                 | o |   | o | o | o |   |   | 6 |
|                      | CTRMCAMV35S                | o | o |   | o | o | o |   | 6 |
|                      | SITEIIATCYTC               | o |   | o |   | o |   | o | 6 |
|                      | SORLIP2AT                  | o | o | o |   | o |   | o | 6 |
|                      | CBFHV                      |   | o |   | o | o | o |   | 6 |
|                      | PRECONSCRHSP70A            |   | o |   | o | o | o | o | 6 |
|                      | TATABOX3                   | o | o | o |   |   | o | o | 5 |
|                      | IBOX                       | o |   |   | o |   | o | o | 5 |

|                         |   |   |   |   |   |   |   |   |   |   |
|-------------------------|---|---|---|---|---|---|---|---|---|---|
| 2SSEEDPROTBANAPA        |   |   |   | o |   | o | o | o | o | 5 |
| MYBPZM                  | o |   |   |   | o |   |   | o | o | 5 |
| ARFAT                   | o | o |   |   | o | o |   |   |   | 5 |
| AACACOREOSGLUB1         |   |   |   | o |   | o | o | o |   | 5 |
| SEBFCONSSTPR10A         |   |   | o |   | o | o | o |   |   | 5 |
| -10PEHVPSBD             | o |   |   | o |   | o | o |   |   | 5 |
| ABRELATERD1             | o |   |   | o |   | o |   | o | o | 5 |
| CAREOSREPo              |   |   | o | o |   | o | o | o |   | 5 |
| IBOXCORENT              | o |   |   |   | o |   | o | o | o | 5 |
| SREATMSD                |   |   |   |   | o | o |   | o | o | 5 |
| E2FCONSENSUS            | o |   |   | o | o | o |   |   | o | 5 |
| BOXLCOREDCPAL           |   |   | o |   | o | o |   | o |   | 5 |
| AMYBOX1                 |   |   | o |   |   | o | o |   | o | 4 |
| RYREPEATLEGUMIN-<br>BOX |   |   | o | o |   |   |   | o | o | 4 |
| RYREPEATGMGY2           |   |   | o | o |   |   |   | o | o | 4 |
| SV40COREENHAN           | o |   |   |   |   |   | o |   | o | 4 |
| RBCSCONSENSUS           | o |   |   | o |   |   |   |   | o | 4 |
| CCA1ATLHCB1             |   |   | o |   |   |   | o | o |   | 4 |
| MYBPLANT                | o | o |   |   |   |   |   | o | o | 4 |
| MYCATRD22               |   |   | o | o |   |   | o |   |   | 4 |
| MYBGAVH                 |   |   | o |   |   | o | o |   | o | 4 |
| WBBOXPCWRKY1            | o | o |   |   |   | o | o |   |   | 4 |
| TATABOXOSPAL            |   |   |   | o | o |   |   | o |   | 4 |
| DRE2COREZMRAB17         |   |   | o |   | o | o | o |   |   | 4 |
| MYCATERD1               |   |   | o | o |   |   | o |   |   | 4 |
| WBOXNTCHN48             |   |   | o | o |   | o |   |   | o | 4 |
| -300CORE                |   |   |   |   |   |   | o | o |   | 3 |
| NAPINMOTIFBN            |   |   | o |   |   |   |   |   | o | 3 |
| TATABOX2                |   |   |   | o |   |   |   |   | o | 3 |
| MYB2AT                  |   |   |   | o |   |   | o |   |   | 3 |
| QELEMENTZMZM13          |   |   | o |   |   |   | o |   | o | 3 |
| PROXBNNAPA              |   |   |   | o |   |   |   | o | o | 3 |
| TELOBOXATEEF1AA1        |   |   |   |   |   | o |   | o | o | 3 |
| CATATGGMSAUR            |   |   |   |   | o |   | o |   | o | 3 |
| CARGATCONSENSUS         |   |   | o | o |   |   | o |   |   | 3 |
| PREATPRODHD             | o |   |   | o |   |   |   |   | o | 3 |
| UP2ATMSD                |   |   |   |   |   | o |   | o | o | 3 |
| SORLIP1AT               |   |   |   | o | o |   | o |   |   | 3 |
| XYLAT                   | o |   |   |   | o |   |   |   | o | 3 |
| INTRONLOWER             |   |   |   |   | o |   | o |   |   | 2 |
| ACGTABOX                | o |   |   | o |   |   |   |   |   | 2 |
| PALBOXAPC               |   |   |   |   |   |   |   |   | o | 2 |
| LTREATLTI78             |   |   | o |   |   | o |   |   |   | 2 |
| MYBATRD22               | o |   |   |   |   |   |   |   | o | 2 |
| SP8BFIBSP8BIB           | o |   |   |   |   |   |   |   |   | 2 |
| CGACGOSAMY3             |   |   |   |   |   |   |   | o |   | 2 |
| S1FSORPL21              | o |   |   |   |   |   |   |   | o | 2 |
| GCN4OSGLUB1             |   |   |   | o |   |   |   |   | o | 2 |
| ACGTOSGLUB1             |   |   |   |   |   | o |   |   | o | 2 |
| RAV1BAT                 | o |   |   |   |   | o |   |   |   | 2 |
| REBETALGLHCB21          |   |   | o |   |   |   |   |   | o | 2 |

|              |                       |   |   |   |   |   |   |
|--------------|-----------------------|---|---|---|---|---|---|
|              | UPRMOTIFIAT           | o |   |   |   | o | 2 |
|              | GCCCORE               |   | o |   |   |   | 2 |
|              | LEAFYATAG             | o |   |   | o |   | 2 |
|              | WUSATAg               | o |   |   |   | o | 2 |
|              | MYB1LEPR              |   | o | o |   |   | 2 |
|              | P1BS                  |   |   | o |   | o | 2 |
|              | UP1ATMSD              | o |   | o |   |   | 2 |
|              | ANAERO3CONSENSUS      |   |   | o |   |   | 2 |
|              | SORLIP5AT             |   |   |   | o | o | 2 |
|              | SORLREP3AT            |   |   | o |   | o | 2 |
|              | SEF1MOTIF             |   |   |   |   | o | 1 |
|              | AMYBOX2               |   |   |   | o |   | 1 |
|              | CERGLUBOX2PSLEGA      |   |   | o |   |   | 1 |
|              | ERELEE4               |   |   |   |   | o | 1 |
|              | CACGTGMOTIF           |   |   |   | o |   | 1 |
|              | GT1MOTIFPSRBCS        |   |   |   |   | o | 1 |
|              | HEXMOTIFTAH3H4        |   |   |   |   | o | 1 |
|              | RYREPEATVFLEB4        |   |   | o |   |   | 1 |
|              | ACGTTBOX              |   |   |   |   |   | 1 |
|              | MEJARELELOX           |   |   |   |   | o | 1 |
|              | SP8BFIBSP8AIB         |   |   |   |   | o | 1 |
|              | SURE2STPAT21          |   |   | o |   |   | 1 |
|              | RGATAOS               |   |   |   |   | o | 1 |
|              | AGCBOXNPGLB           |   |   |   |   |   | 1 |
|              | LTRE1HVBLT49          |   | o |   |   |   | 1 |
| Light stress | TATCCAYMOTI-FOSRAMY3D |   |   |   | o |   | 1 |
|              | PYRIM-IDINEBOXHVEPB1  |   |   |   |   |   | 1 |
|              | AGATCONSENSUS         |   |   |   | o |   | 1 |
|              | AGL1ATCONSENSUS       |   |   |   | o |   | 1 |
|              | AGL2ATCONSENSUS       |   |   | o |   |   | 1 |
|              | PROLAMINBOX-OSGLUB1   |   |   |   |   | o | 1 |
|              | CACGCAATGMGH3         |   |   |   |   |   | 1 |
|              | HDZIP2ATATHB2         | o |   |   |   |   | 1 |
|              | TGACGTMAMY            |   |   |   |   | o | 1 |
|              | L1BOXATPDF1           |   |   | o |   |   | 1 |
|              | ACGTABREMO-TIFA2OSEM  |   |   |   | o |   | 1 |
|              | CRTDREHVCBF2          |   |   |   |   | o | 1 |
|              | GARE1OSREP1           |   |   |   |   | o | 1 |
|              | GARE2OSREP1           |   |   |   |   |   | 1 |
|              | TGTCACAC-MCUCUMISIN   |   |   |   | o |   | 1 |
|              | BP5OSWX               | o |   |   |   |   | 1 |
|              | GADOWNAT              |   |   |   | o |   | 1 |
|              | EMHVCHORD             |   |   |   |   |   | 1 |
|              | T/GBOXATPIN2          | o |   |   |   |   | 1 |
|              | SBOXATRBCS            |   |   |   | o |   | 1 |
|              | ABRERATCAL            |   |   |   | o |   | 1 |
|              | CMSRE1IBSPOA          |   |   |   |   | o | 1 |

Note: "o",have at least one motif, blank, none.

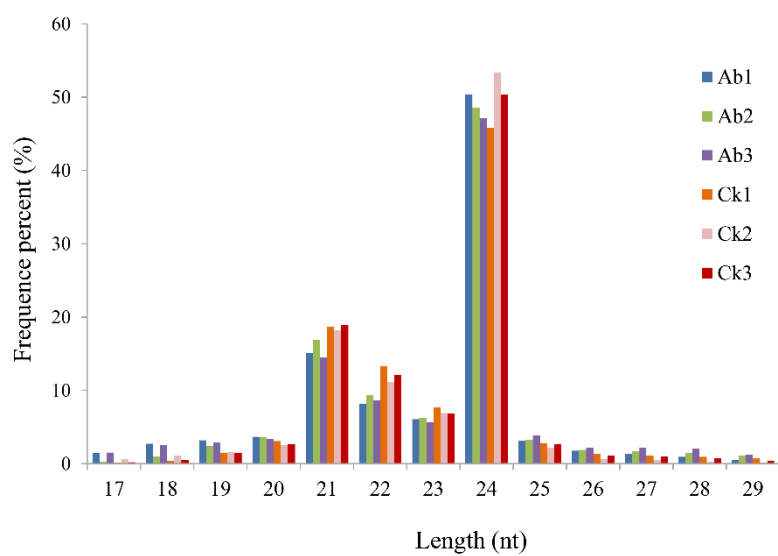

Figure S1 Length distribution of sRNA. Ab, aborting lotus flower buds; Ck, normal lotus flower buds.

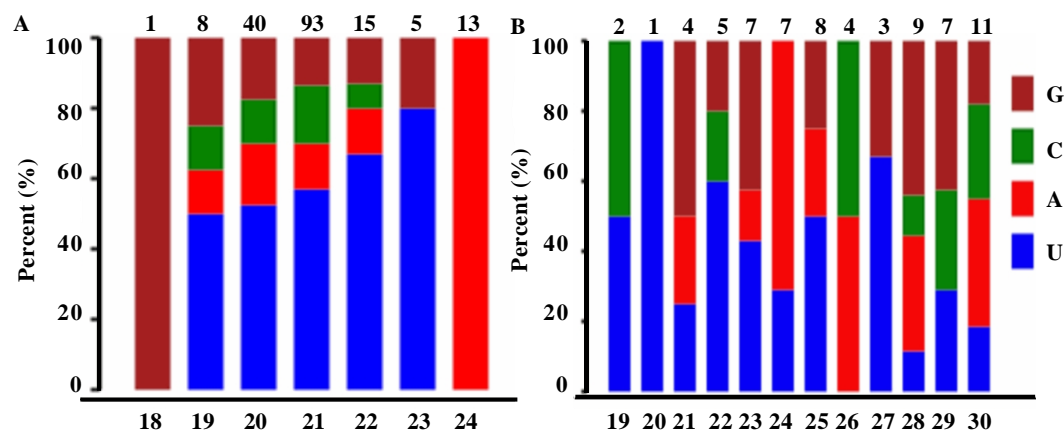

Figure S2 The first base distribution of known and novel miRNAs

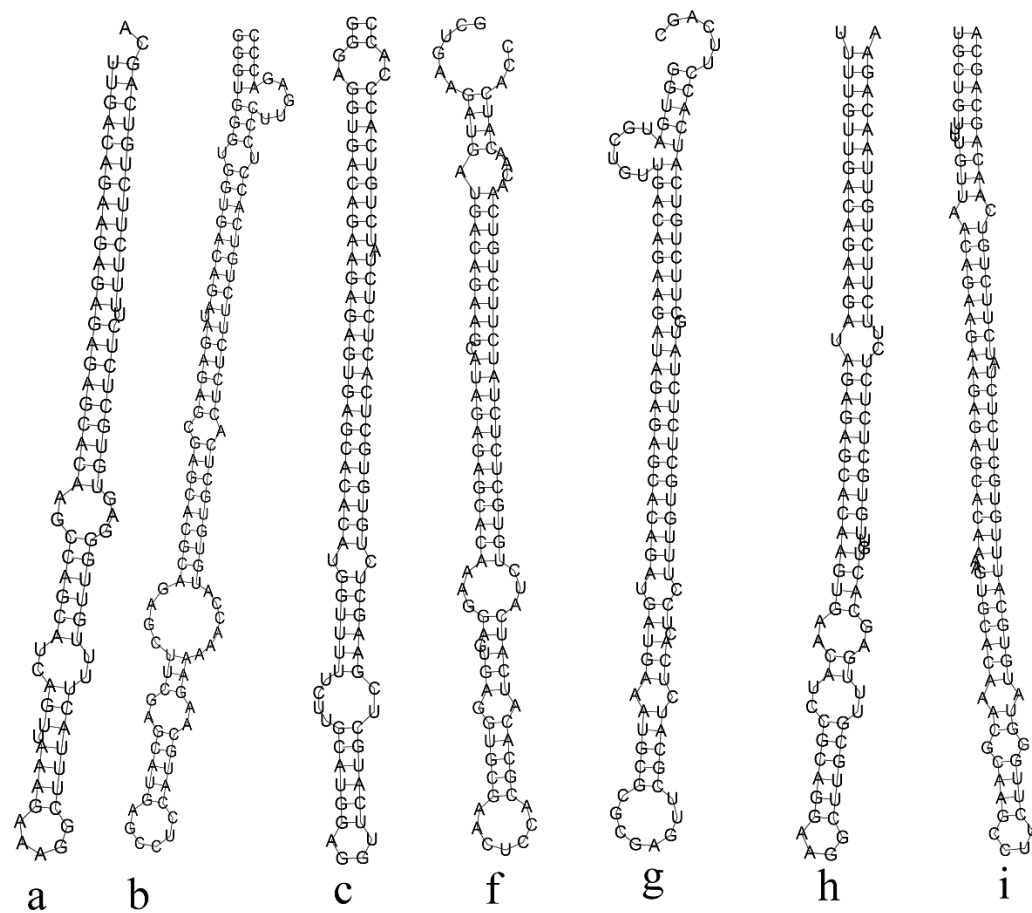

Figure S3 Hairpin structure of miR156 family precursors

A

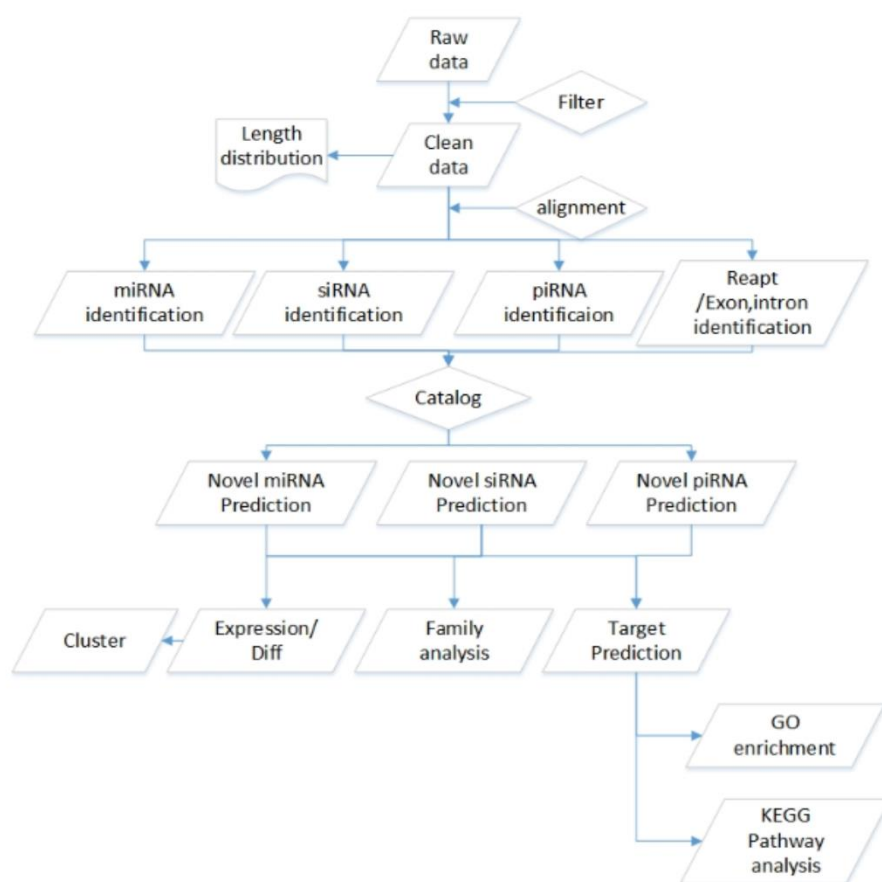

B

**RNA extraction  
& Library construction  
& Sequencing**

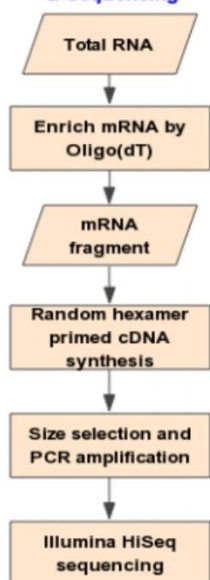

**Bioinformatic Analysis**

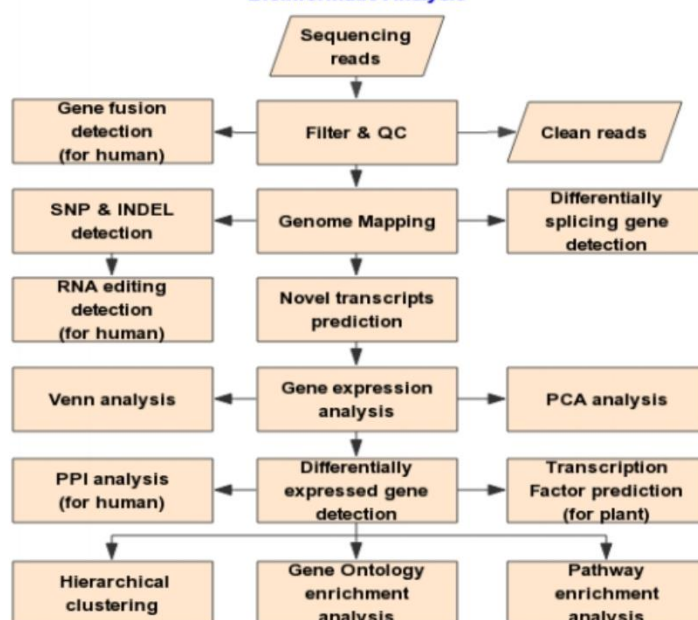

Figure S4 Bioinformatics analysis pipeline for Small RNA (A) and mRNA (B) sequencing.
